# Supplementary material for: Geographical Patterns of Genetic Variation in Locoto Chile (Capsicum pubescens) in the Americas Inferred by Genome-Wide Data Analysis
Source: MDPI journal article supplement (doi:10.3390/plants11212911), 2022-10-29
Supplement: s1 [file s1]

**Figure S1.** Morphological diversity among the studied *C. pubescens* accessions. Representative images showing: **(a)** corolla colour and number of pieces, **(b)** variation in fruit shape and colour, **(c)** variable levels of pubescence. Accessions numbers are indicated.

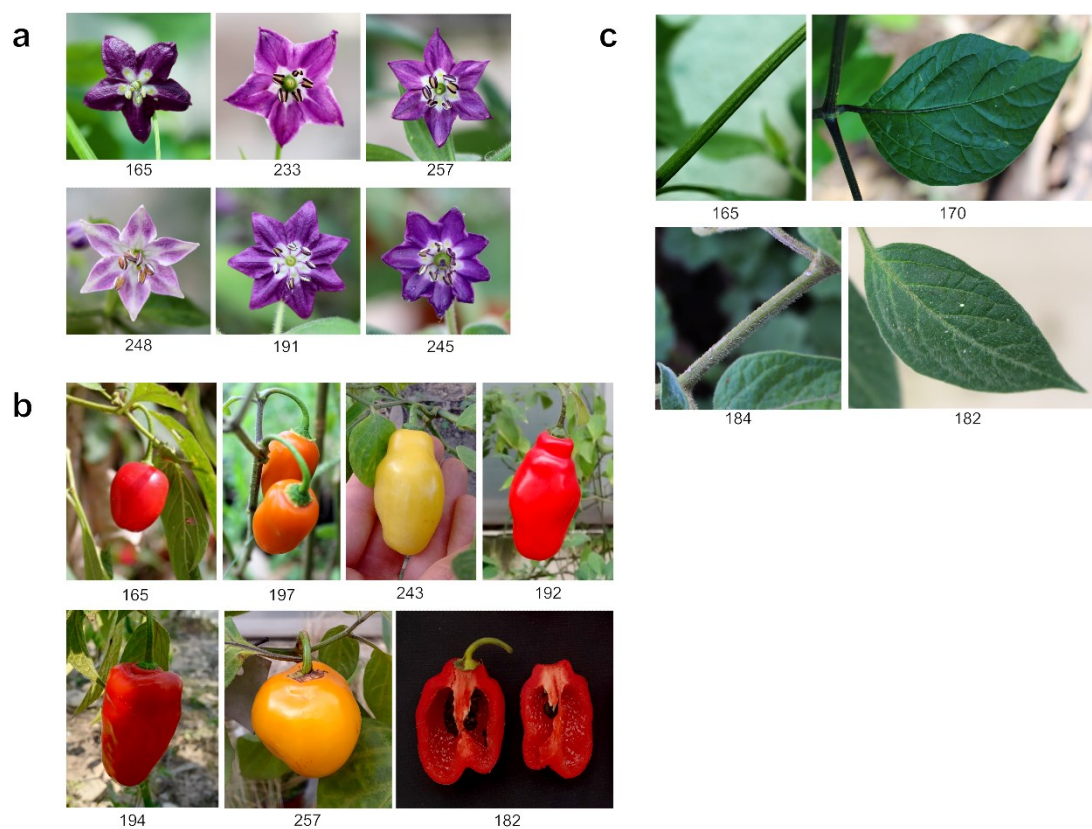

**Figure S2.** Results of the assessment of the sequence similarity clustering threshold parameter (ct) in ipyrad [61]. Values ranging from 0.85 to 0.99 were assessed. The number of clusters, the average read depth, the number of putatively paralogous loci (filtered by maxH), the allelic variation (heterozygosity), the number of retained loci, the retained sequence variation (number of SNPs), and the missingness percentage were recorded and plotted.

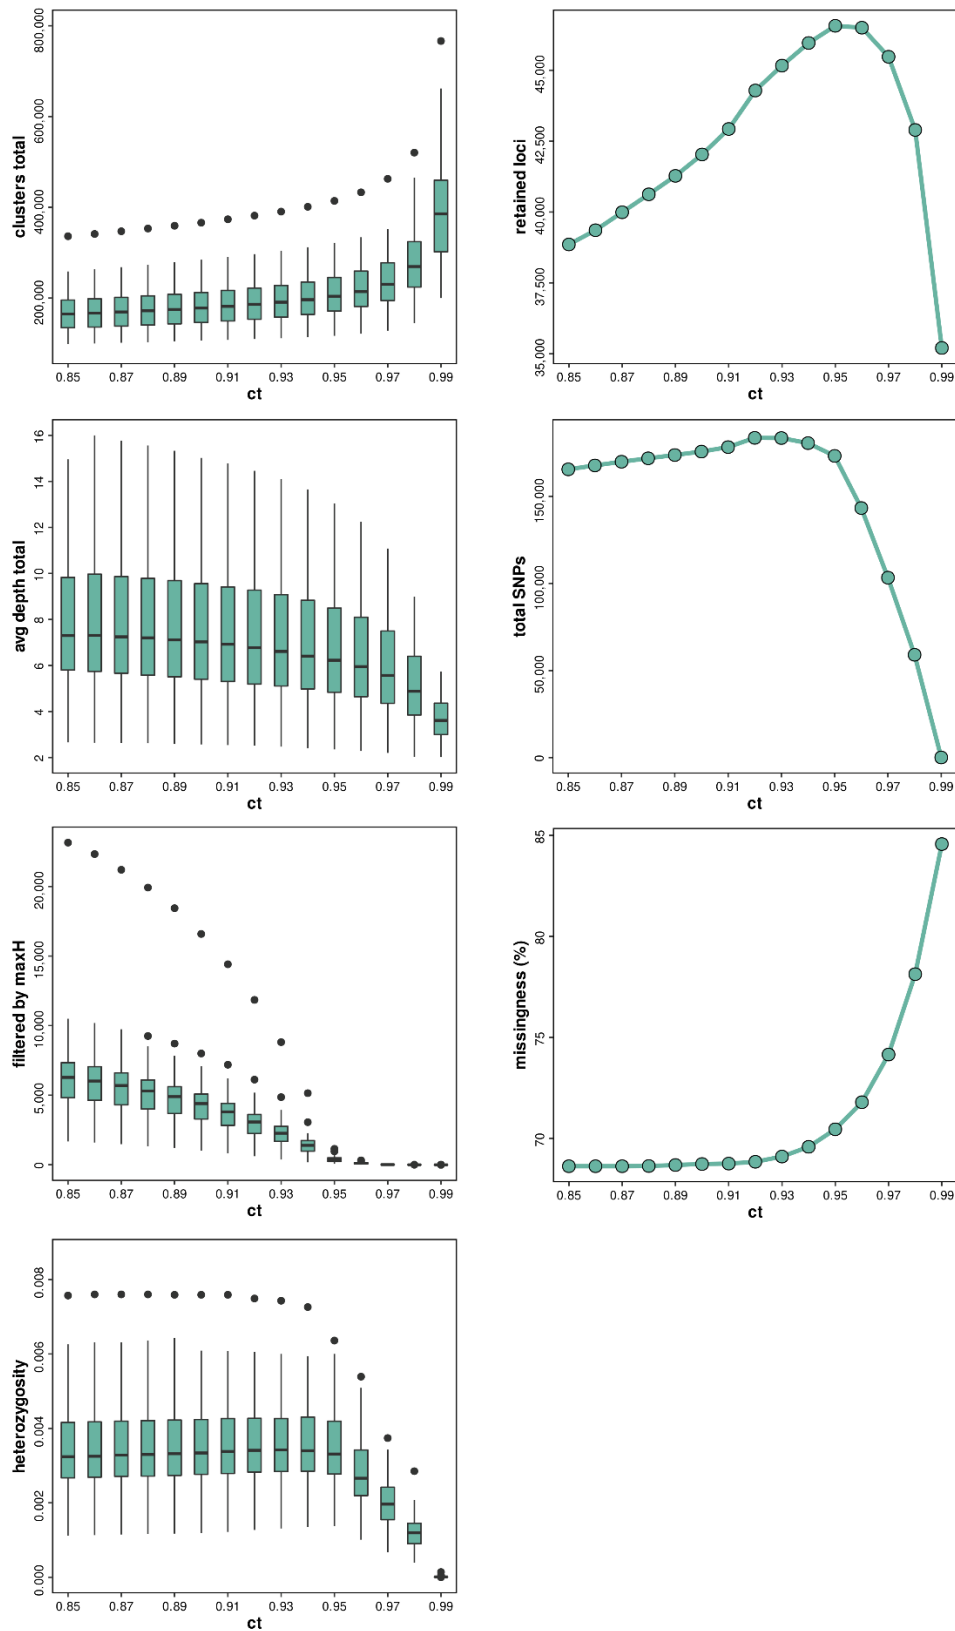

**Table S1.** Metadata for *C. pubescens* accessions analysed, and cluster assignment at  $K=3$ .

| ID  | Locality and voucher number [if available]        | Origin        | Fruit colour, shape      | Raw reads | Filtered reads | Filtered loci at $m=4$ | Filtered loci at $m=34$ | DAPC cluster at $K=3$ | Admixture cluster at ( $K=3$ ) |
|-----|---------------------------------------------------|---------------|--------------------------|-----------|----------------|------------------------|-------------------------|-----------------------|--------------------------------|
| 202 | Argentina: Jujuy, Humahuaca                       | local market  | red, elongated           | 2634423   | 2377950        | 64845                  | 42125                   | cluster 1             | cluster 1                      |
| 268 | Argentina: Jujuy, Maimara                         | local market  | yellow, elongated        | 1403257   | 1283816        | 46699                  | 34903                   | cluster 1             | cluster 1                      |
| 269 | Argentina: Jujuy, Maimara                         | local market  | orange-red, blocky       | 1246268   | 1098685        | 26629                  | 20894                   | cluster 1             | cluster 1                      |
| 64  | Argentina: Salta, Salta                           | local market  | orange-yellow, blocky    | 1375602   | 1298986        | -                      | -                       | -                     | -                              |
| 84  | Argentina: Salta, Salta                           | local market  | red, round               | 543647    | 534428         | 12727                  | 11102                   | cluster 1             | cluster 1                      |
| 85  | Argentina: Salta, Salta [Carrizo García (CG) 28]  | local market  | red, elongated           | 872440    | 858353         | 22245                  | 19222                   | cluster 1             | cluster 1                      |
| 101 | Argentina: Salta, Salta                           | local market  | red, blocky              | 198626    | 192601         | -                      | -                       | -                     | -                              |
| 271 | Argentina: Salta, Salta                           | local market  | red                      | 453973    | 564838         | 13595                  | 11394                   | cluster 2             | admixed                        |
| 270 | Argentina: Tucuman, San Miguel de Tucuman         | seed donor    | red, blocky              | 532181    | 834559         | 27185                  | 21930                   | cluster 2             | admixed                        |
| 272 | Argentina: Tucuman, San Miguel de Tucuman         | seed donor    | yellow, blocky           | 766317    | 916553         | 33543                  | 26367                   | cluster 1             | cluster 1                      |
| 181 | Bolivia: Chuquisaca, Muyupampa                    | local market  | red, elongated           | 1925979   | 1830717        | 58670                  | 39524                   | cluster 1             | cluster 1                      |
| 253 | Bolivia: Chuquisaca, Muyupampa                    | local market  | red, elongated           | 2091852   | 1956892        | 67906                  | 42054                   | cluster 1             | cluster 1                      |
| 211 | Bolivia: Chuquisaca, Campo Redondo [Barboza 4923] | family garden | unknown                  | 2455388   | 2313256        | 64531                  | 41722                   | cluster 1             | admixed                        |
| 190 | Bolivia: Chuquisaca, Villa Serrano                | local market  | orange-yellow, elongated | 2110489   | 1968839        | 61961                  | 40677                   | cluster 2             | cluster 2                      |
| 191 | Bolivia: Chuquisaca, Villa Serrano                | local market  | orange-yellow, elongated | 1991526   | 1893578        | 62189                  | 41161                   | cluster 2             | admixed                        |
| 192 | Bolivia: Chuquisaca, Villa Serrano                | local market  | red, elongated           | 2126767   | 1982643        | 62085                  | 40789                   | cluster 2             | cluster 2                      |
| 193 | Bolivia: Chuquisaca, Villa Serrano                | local market  | red, elongated           | 2458157   | 1736772        | 46424                  | 31032                   | cluster 2             | admixed                        |
| 179 | Bolivia: Cochabamba                               | grocery store | red, blocky              | 1476390   | 1403666        | 51473                  | 35928                   | cluster 1             | cluster 1                      |
| 245 | Bolivia: Cochabamba, Cochabamba                   | grocery store | red, blocky              | 1759136   | 1633033        | 50128                  | 35333                   | cluster 1             | cluster 1                      |
| 88  | Bolivia: Cochabamba, Pojo                         | local market  | red                      | 257306    | 251084         | -                      | -                       | -                     | -                              |
| 198 | Bolivia: Cochabamba, Pojo                         | local market  | red, blocky              | 1627156   | 1556342        | 51309                  | 35496                   | cluster 1             | cluster 1                      |
| 186 | Bolivia: La Paz, La Paz ('yungueños')             | local market  | orange-red, round        | 2469779   | 2373189        | 61423                  | 39414                   | cluster 2             | cluster 2                      |
| 187 | Bolivia: La Paz, La Paz ('yungueños')             | local market  | orange-yellow, round     | 2298623   | 2120662        | 64485                  | 41777                   | cluster 2             | admixed                        |

|     |                                                      |                             |                          |         |         |       |       |           |           |
|-----|------------------------------------------------------|-----------------------------|--------------------------|---------|---------|-------|-------|-----------|-----------|
| 188 | Bolivia: La Paz, La Paz ('yungueños')                | local market                | orange-yellow, round     | 3091143 | 2940865 | 67677 | 42883 | cluster 2 | admixed   |
| 189 | Bolivia: La Paz, La Paz ('yungueños')                | local market                | red, elongated           | 1508887 | 1432400 | 42548 | 31125 | cluster 2 | cluster 2 |
| 243 | Bolivia: La Paz, La Paz ('yungueños')                | local market                | light-yellow, elongated  | 2785501 | 1319629 | 51932 | 36731 | cluster 2 | cluster 2 |
| 259 | Bolivia: La Paz, La Paz ('yungueños')                | local market                | red, elongated           | 956413  | 882998  | 30655 | 22595 | cluster 2 | admixed   |
| 196 | Bolivia: La Paz, La Paz, (Achocalla)                 | local market                | red, round               | 921611  | 870387  | 30475 | 23776 | cluster 2 | admixed   |
| 197 | Bolivia: La Paz, La Paz, (Achocalla)                 | local market                | orange, elongated        | 2362268 | 2041000 | 64059 | 40418 | cluster 2 | admixed   |
| 246 | Bolivia: La Paz, La Paz, (Achocalla)                 | local market                | orange-yellow, elongated | 1223577 | 1159930 | 49539 | 36057 | cluster 2 | admixed   |
| 249 | Bolivia: La Paz, La Paz, (Achocalla)                 | local market                | red, round               | 2365979 | 2261278 | 64921 | 41915 | cluster 2 | admixed   |
| 9   | Bolivia: La Paz, Apa Apa [Barboza et al. 3658]       | growing freely in the field | orange-red, round        | 678175  | 669212  | 16037 | 13900 | cluster 2 | cluster 2 |
| 165 | Bolivia: La Paz, Apa Apa [CG 75]                     | growing freely in the field | orange-red, round        | 1381022 | 1261441 | 41463 | 31495 | cluster 2 | cluster 2 |
| 172 | Bolivia: La Paz, Coroico [Barboza 4890]              | family garden               | orange-yellow, round     | 932760  | 876737  | 35155 | 27487 | cluster 2 | cluster 2 |
| 173 | Bolivia: La Paz, Coroico [Barboza 4890]              | family garden               | orange-yellow, round     | 719330  | 680765  | 11827 | 8948  | cluster 2 | cluster 2 |
| 174 | Bolivia: La Paz, Coroico [Barboza 4890]              | family garden               | orange-yellow, round     | 1899800 | 1817337 | 53307 | 36989 | cluster 2 | cluster 2 |
| 170 | Bolivia: La Paz, Huancane [Barboza 4889]             | growing freely in the field | red, elongated           | 3813128 | 3662664 | 52667 | 34169 | cluster 2 | cluster 2 |
| 171 | Bolivia: La Paz, Huancane [Barboza 4889]             | growing freely in the field | red, round               | 948413  | 885680  | 23293 | 18215 | cluster 2 | cluster 2 |
| 286 | Bolivia: La Paz, Huancane [Barboza 4889]             | growing freely in the field | orange-yellow, round     | 404636  | 366227  | 3290  | 2645  | cluster 2 | cluster 2 |
| 89  | Bolivia: Potosí, Tupiza                              | local market                | red                      | 575756  | 568595  | -     | -     | -         | -         |
| 199 | Bolivia: Potosí, Tupiza                              | local market                | red, elongated           | 1428175 | 1246406 | 44109 | 33081 | cluster 1 | admixed   |
| 184 | Bolivia: Santa Cruz, Camiri                          | local market                | red, blocky              | 2122192 | 1935005 | 57510 | 40230 | cluster 1 | cluster 1 |
| 185 | Bolivia: Santa Cruz, Camiri                          | local market                | red, elongated           | 1572988 | 1470334 | 43790 | 31169 | cluster 1 | admixed   |
| 194 | Bolivia: Santa Cruz, Comarapa                        | local market                | orange-yellow, blocky    | 1168069 | 1124773 | 34464 | 25980 | cluster 1 | cluster 1 |
| 195 | Bolivia: Santa Cruz, Comarapa                        | local market                | red, elongated           | 1630556 | 1503309 | 53022 | 36937 | cluster 1 | cluster 1 |
| 114 | Bolivia: Santa Cruz, Moro Moro [CG et al. 35]        | family garden               | red, elongated           | 2146648 | 2044838 | 23850 | 17938 | cluster 1 | cluster 1 |
| 182 | Bolivia: Santa Cruz, Moro Moro                       | family garden               | red, elongated           | 753672  | 713598  | 19317 | 13334 | cluster 1 | cluster 1 |
| 83  | Bolivia: Santa Cruz, Santa Cruz de la Sierra [CG 27] | local market                | red                      | 966666  | 952663  | 30604 | 24453 | cluster 1 | cluster 1 |
| 200 | Bolivia: Santa Cruz, Santa Cruz de la Sierra         | local market                | red, elongated           | 1220486 | 1158638 | 42251 | 32077 | cluster 1 | cluster 1 |
| 102 | Costa Rica                                           | LP Co. 'Costa Rican Red'    | red, elongated           | 383611  | 379024  | -     | -     | -         | -         |
| 201 | Costa Rica                                           | LP Co. 'Costa Rican Red'    | red, elongated           | 1850043 | 1777304 | 54497 | 37136 | cluster 3 | cluster 3 |

|     |                                                 |                         |                          |         |         |       |       |           |           |
|-----|-------------------------------------------------|-------------------------|--------------------------|---------|---------|-------|-------|-----------|-----------|
| 91  | Ecuador                                         | LP Co. 'Ecuadorian Red' | red, elongated           | 892609  | 877893  | 29256 | 24227 | cluster 2 | admixed   |
| 256 | Ecuador: Azuay                                  | LP Co. 'Turbo pube'     | orange-yellow, elongated | 2576762 | 2387979 | 69684 | 42287 | cluster 2 | admixed   |
| 266 | Ecuador: Loja                                   | LP Co. 'Aji Largo'      | red, elongated           | 1126367 | 998700  | 32416 | 25100 | cluster 2 | admixed   |
| 263 | Guatemala                                       | WUR 'CGN 22796'         | red, blocky              | 834898  | 700821  | 14748 | 10714 | cluster 2 | cluster 3 |
| 257 | Guatemala: Quiche, Santo Tomas Chichicastenango | LP Co. 'CAP 363'        | orange-yellow, elongated | 2585141 | 2431794 | 70572 | 42782 | cluster 3 | cluster 3 |
| 251 | Mexico                                          | LP Co. 'Manzano rojo'   | red, blocky              | 1010453 | 933189  | 33496 | 25210 | cluster 3 | cluster 3 |
| 178 | Mexico: Mexico City                             | local market            | orange-yellow, blocky    | 1554713 | 1391440 | 47971 | 34231 | cluster 3 | cluster 3 |
| 203 | Mexico: Mexico City                             | local market            | orange-yellow, blocky    | 1272303 | 1210991 | 47019 | 34724 | cluster 3 | cluster 3 |
| 244 | Mexico: Mexico City, Coyoacan                   | local market            | orange-yellow, blocky    | 1133926 | 1085677 | 38233 | 29276 | cluster 3 | cluster 3 |
| 177 | Mexico: Mexico City, Coyoacan                   | local market            | orange-yellow, blocky    | 2586734 | 2299246 | 65751 | 41352 | cluster 3 | cluster 3 |
| 254 | Peru                                            | LP Co. 'CAP 217'        | red, elongated           | 2657624 | 2441653 | 69825 | 42628 | cluster 2 | admixed   |
| 128 | Peru: Cusco                                     | local market            | red, elongated           | 473582  | 466474  | -     | -     | -         | -         |
| 233 | Peru: Cusco                                     | local market            | red, blocky              | 2098880 | 1847495 | 59975 | 39255 | cluster 2 | admixed   |
| 255 | Peru: Cusco                                     | local market            | red, blocky              | 2092730 | 1941007 | 55417 | 37151 | cluster 2 | cluster 2 |
| 265 | Peru: Huanuco                                   | WUR 'CGN 22108'         | red, elongated           | 1693733 | 1573667 | 56821 | 40467 | cluster 2 | admixed   |
| 262 | Peru: Junin                                     | WUR 'CGN 23768'         | yellow, elongated        | 1012055 | 930939  | 35737 | 25589 | cluster 2 | admixed   |
| 90  | Peru: Piura                                     | local market            | red                      | 558605  | 551298  | -     | -     | -         | -         |
| 247 | Peru: Piura                                     | local market            | red, blocky              | 1145483 | 1105495 | 38707 | 30610 | cluster 2 | admixed   |
| 175 | Peru: Trujillo                                  | local market            | orange-yellow, blocky    | 2042003 | 1821689 | 61369 | 40018 | cluster 2 | admixed   |
| 176 | Peru: Trujillo                                  | local market            | orange-yellow, blocky    | 1076414 | 999386  | 30560 | 23990 | cluster 2 | admixed   |
| 248 | Spain: Canarias, LP (San Isidro)                | LP Co. 'San Isidro'     | orange-red, blocky       | 2169006 | 2025608 | 63998 | 41767 | cluster 2 | admixed   |
| 264 | Unknown                                         | seed donor              | unknown                  | 1143439 | 952540  | 21546 | 16535 | cluster 3 | cluster 3 |
| 267 | Unknown                                         | LP Co. 'Canario'        | yellow, round            | 1402337 | 1127357 | 33528 | 25770 | cluster 3 | cluster 3 |

LP Co.: Semillas La Palma Company, Germany

WUR: genebank at the Centre for Genetic Resources, Wageningen University, The Netherlands

**Table S2.** Average Admixture cluster assignment for *C. pubescens* samples for K= 2 (a), 3 (b), 4 (c) and 5 (d) calculated from 1,462 unlinked biallelic SNPs markers.

(a) K= 2

| Sample ID | Cluster 1 | Cluster 2 |
|-----------|-----------|-----------|
| 114       | 1.0000    | 0.0000    |
| 165       | 0.8292    | 0.1708    |
| 170       | 0.6730    | 0.3270    |
| 171       | 0.6992    | 0.3008    |
| 172       | 0.5678    | 0.4322    |
| 173       | 0.6120    | 0.3880    |
| 174       | 0.6577    | 0.3423    |
| 175       | 0.0000    | 1.0000    |
| 176       | 0.0277    | 0.9723    |
| 177       | 0.0000    | 1.0000    |
| 178       | 0.0000    | 1.0000    |
| 179       | 0.8738    | 0.1262    |
| 181       | 1.0000    | 0.0000    |
| 182       | 1.0000    | 0.0000    |
| 184       | 1.0000    | 0.0000    |
| 185       | 1.0000    | 0.0000    |
| 186       | 0.3968    | 0.6032    |
| 187       | 0.3531    | 0.6469    |
| 188       | 0.4547    | 0.5453    |
| 189       | 0.5883    | 0.4117    |
| 190       | 0.7336    | 0.2664    |
| 191       | 0.8349    | 0.1651    |
| 192       | 0.7506    | 0.2494    |
| 193       | 0.7448    | 0.2552    |
| 194       | 1.0000    | 0.0000    |
| 195       | 1.0000    | 0.0000    |
| 196       | 0.6104    | 0.3896    |
| 197       | 0.4253    | 0.5747    |
| 198       | 1.0000    | 0.0000    |
| 199       | 0.7965    | 0.2035    |
| 200       | 1.0000    | 0.0000    |
| 201       | 0.0000    | 1.0000    |
| 202       | 1.0000    | 0.0000    |
| 203       | 0.0000    | 1.0000    |
| 211       | 0.9993    | 0.0007    |
| 233       | 0.0245    | 0.9755    |
| 243       | 0.2962    | 0.7038    |
| 244       | 0.0000    | 1.0000    |
| 245       | 0.8702    | 0.1298    |
| 246       | 0.5131    | 0.4869    |
| 247       | 0.0708    | 0.9292    |
| 248       | 0.0000    | 1.0000    |
| 249       | 0.4619    | 0.5381    |
| 251       | 0.0000    | 1.0000    |

|     |        |        |
|-----|--------|--------|
| 253 | 1.0000 | 0.0000 |
| 254 | 0.0000 | 1.0000 |
| 255 | 0.1231 | 0.8769 |
| 256 | 0.0000 | 1.0000 |
| 257 | 0.0000 | 1.0000 |
| 259 | 0.5764 | 0.4236 |
| 262 | 0.0000 | 1.0000 |
| 263 | 0.0000 | 1.0000 |
| 264 | 0.0000 | 1.0000 |
| 265 | 0.0000 | 1.0000 |
| 266 | 0.0000 | 1.0000 |
| 267 | 0.0000 | 1.0000 |
| 268 | 0.8918 | 0.1082 |
| 269 | 0.8889 | 0.1111 |
| 270 | 0.0000 | 1.0000 |
| 271 | 0.0000 | 1.0000 |
| 272 | 1.0000 | 0.0000 |
| 286 | 0.5747 | 0.4253 |
| 83  | 1.0000 | 0.0000 |
| 84  | 1.0000 | 0.0000 |
| 85  | 1.0000 | 0.0000 |
| 9   | 0.6432 | 0.3568 |
| 91  | 0.0706 | 0.9294 |

**(b)**  $K=3$

| Sample ID | Cluster 1 | Cluster 2 | Cluster 3 |
|-----------|-----------|-----------|-----------|
| 114       | 1.0000    | 0.0000    | 0.0000    |
| 165       | 0.3361    | 0.6639    | 0.0000    |
| 170       | 0.1973    | 0.7957    | 0.0070    |
| 171       | 0.1754    | 0.8246    | 0.0000    |
| 172       | 0.0000    | 0.9492    | 0.0507    |
| 173       | 0.0000    | 1.0000    | 0.0000    |
| 174       | 0.0608    | 0.9392    | 0.0000    |
| 175       | 0.0000    | 0.4492    | 0.5508    |
| 176       | 0.0000    | 0.6209    | 0.3791    |
| 177       | 0.0000    | 0.0000    | 1.0000    |
| 178       | 0.0000    | 0.0000    | 1.0000    |
| 179       | 0.9055    | 0.0092    | 0.0853    |
| 181       | 0.9197    | 0.0803    | 0.0000    |
| 182       | 1.0000    | 0.0000    | 0.0000    |
| 184       | 1.0000    | 0.0000    | 0.0000    |
| 185       | 0.6852    | 0.3148    | 0.0000    |
| 186       | 0.0000    | 0.8712    | 0.1288    |
| 187       | 0.1748    | 0.4998    | 0.3254    |
| 188       | 0.2588    | 0.5465    | 0.1947    |
| 189       | 0.0988    | 0.8836    | 0.0177    |
| 190       | 0.1755    | 0.8245    | 0.0000    |
| 191       | 0.3362    | 0.6546    | 0.0091    |
| 192       | 0.1485    | 0.8515    | 0.0000    |

|     |        |        |        |
|-----|--------|--------|--------|
| 193 | 0.3258 | 0.6742 | 0.0000 |
| 194 | 1.0000 | 0.0000 | 0.0000 |
| 195 | 0.9940 | 0.0000 | 0.0060 |
| 196 | 0.2319 | 0.7348 | 0.0333 |
| 197 | 0.2998 | 0.3901 | 0.3101 |
| 198 | 1.0000 | 0.0000 | 0.0000 |
| 199 | 0.6091 | 0.3909 | 0.0000 |
| 200 | 1.0000 | 0.0000 | 0.0000 |
| 201 | 0.0000 | 0.1121 | 0.8879 |
| 202 | 1.0000 | 0.0000 | 0.0000 |
| 203 | 0.0000 | 0.0000 | 1.0000 |
| 211 | 0.6641 | 0.3359 | 0.0000 |
| 233 | 0.0015 | 0.6269 | 0.3716 |
| 243 | 0.0000 | 0.8769 | 0.1231 |
| 244 | 0.0000 | 0.0000 | 1.0000 |
| 245 | 0.7559 | 0.2169 | 0.0273 |
| 246 | 0.3924 | 0.4523 | 0.1554 |
| 247 | 0.0070 | 0.5030 | 0.4900 |
| 248 | 0.0000 | 0.6028 | 0.3972 |
| 249 | 0.3405 | 0.4759 | 0.1836 |
| 251 | 0.0000 | 0.0000 | 1.0000 |
| 253 | 1.0000 | 0.0000 | 0.0000 |
| 254 | 0.0000 | 0.5419 | 0.4581 |
| 255 | 0.0000 | 0.7409 | 0.2591 |
| 256 | 0.0000 | 0.3710 | 0.6290 |
| 257 | 0.0000 | 0.0000 | 1.0000 |
| 259 | 0.3911 | 0.5017 | 0.1072 |
| 262 | 0.0000 | 0.3583 | 0.6417 |
| 263 | 0.0000 | 0.0452 | 0.9548 |
| 264 | 0.0000 | 0.0000 | 1.0000 |
| 265 | 0.0000 | 0.4635 | 0.5365 |
| 266 | 0.0000 | 0.5189 | 0.4811 |
| 267 | 0.0000 | 0.0000 | 1.0000 |
| 268 | 0.9704 | 0.0000 | 0.0296 |
| 269 | 0.9503 | 0.0000 | 0.0497 |
| 270 | 0.0000 | 0.4920 | 0.5080 |
| 271 | 0.0000 | 0.6599 | 0.3400 |
| 272 | 1.0000 | 0.0000 | 0.0000 |
| 286 | 0.0098 | 0.9295 | 0.0608 |
| 83  | 1.0000 | 0.0000 | 0.0000 |
| 84  | 1.0000 | 0.0000 | 0.0000 |
| 85  | 1.0000 | 0.0000 | 0.0000 |
| 9   | 0.2007 | 0.6917 | 0.1076 |
| 91  | 0.0825 | 0.3351 | 0.5824 |

(c)  $K=4$

| Sample ID | Cluster 1 | Cluster 2 | Cluster 3 | Cluster 4 |
|-----------|-----------|-----------|-----------|-----------|
| 114       | 0.9494    | 0.0427    | 0.0079    | 0.0000    |
| 165       | 0.2095    | 0.7537    | 0.0368    | 0.0000    |



|     |        |        |        |        |
|-----|--------|--------|--------|--------|
| 170 | 0.0089 | 0.9574 | 0.0337 | 0.0000 |
| 171 | 0.0000 | 1.0000 | 0.0000 | 0.0000 |
| 172 | 0.0000 | 0.7582 | 0.2418 | 0.0000 |
| 173 | 0.0000 | 0.8642 | 0.1357 | 0.0000 |
| 174 | 0.0000 | 0.8216 | 0.1783 | 0.0000 |
| 175 | 0.0000 | 0.0000 | 0.8418 | 0.1582 |
| 176 | 0.0000 | 0.1466 | 0.7097 | 0.1437 |
| 177 | 0.0000 | 0.0000 | 0.0000 | 1.0000 |
| 178 | 0.0000 | 0.0000 | 0.0000 | 1.0000 |
| 179 | 0.8724 | 0.0000 | 0.1130 | 0.0147 |
| 181 | 0.8595 | 0.1382 | 0.0023 | 0.0000 |
| 182 | 1.0000 | 0.0000 | 0.0000 | 0.0000 |
| 184 | 1.0000 | 0.0000 | 0.0000 | 0.0000 |
| 185 | 0.5490 | 0.3528 | 0.0982 | 0.0000 |
| 186 | 0.0000 | 0.4501 | 0.4775 | 0.0725 |
| 187 | 0.1517 | 0.1895 | 0.4735 | 0.1853 |
| 188 | 0.2269 | 0.2143 | 0.4916 | 0.0671 |
| 189 | 0.0783 | 0.5545 | 0.3672 | 0.0000 |
| 190 | 0.0000 | 0.6000 | 0.4000 | 0.0000 |
| 191 | 0.0978 | 0.6019 | 0.2998 | 0.0005 |
| 192 | 0.0000 | 0.6000 | 0.4000 | 0.0000 |
| 193 | 0.1113 | 0.5558 | 0.3329 | 0.0000 |
| 194 | 0.8627 | 0.1373 | 0.0000 | 0.0000 |
| 195 | 0.9853 | 0.0000 | 0.0000 | 0.0146 |
| 196 | 0.2017 | 0.4100 | 0.3818 | 0.0065 |
| 197 | 0.2840 | 0.1275 | 0.4030 | 0.1855 |
| 198 | 0.9271 | 0.0729 | 0.0000 | 0.0000 |
| 199 | 0.5469 | 0.2987 | 0.1544 | 0.0000 |
| 200 | 1.0000 | 0.0000 | 0.0000 | 0.0000 |
| 201 | 0.0000 | 0.0147 | 0.2364 | 0.7488 |
| 202 | 1.0000 | 0.0000 | 0.0000 | 0.0000 |
| 203 | 0.0000 | 0.0000 | 0.0000 | 1.0000 |
| 211 | 0.5889 | 0.2963 | 0.1147 | 0.0000 |
| 233 | 0.0000 | 0.0379 | 0.9000 | 0.0621 |
| 243 | 0.0000 | 0.4285 | 0.5174 | 0.0541 |
| 244 | 0.0000 | 0.0000 | 0.0000 | 1.0000 |
| 245 | 0.7333 | 0.1617 | 0.0835 | 0.0214 |
| 246 | 0.3826 | 0.0940 | 0.4905 | 0.0328 |
| 247 | 0.0013 | 0.0269 | 0.7433 | 0.2285 |
| 248 | 0.0000 | 0.0981 | 0.6939 | 0.2079 |
| 249 | 0.3288 | 0.0562 | 0.5819 | 0.0331 |
| 251 | 0.0000 | 0.0000 | 0.0000 | 1.0000 |
| 253 | 1.0000 | 0.0000 | 0.0000 | 0.0000 |
| 254 | 0.0000 | 0.0972 | 0.6825 | 0.2203 |
| 255 | 0.0000 | 0.0503 | 0.9000 | 0.0497 |
| 256 | 0.0000 | 0.0000 | 0.6667 | 0.3333 |
| 257 | 0.0000 | 0.0000 | 0.0000 | 1.0000 |
| 259 | 0.3380 | 0.2560 | 0.3847 | 0.0212 |
| 262 | 0.0000 | 0.0556 | 0.5678 | 0.3766 |

|     |        |        |        |        |
|-----|--------|--------|--------|--------|
| 263 | 0.0000 | 0.0000 | 0.2605 | 0.7395 |
| 264 | 0.0000 | 0.0000 | 0.0000 | 1.0000 |
| 265 | 0.0000 | 0.0000 | 0.8387 | 0.1613 |
| 266 | 0.0000 | 0.0779 | 0.6643 | 0.2578 |
| 267 | 0.0000 | 0.0000 | 0.0000 | 1.0000 |
| 268 | 0.9990 | 0.0000 | 0.0000 | 0.0010 |
| 269 | 0.9902 | 0.0000 | 0.0000 | 0.0097 |
| 270 | 0.0000 | 0.0298 | 0.6966 | 0.2736 |
| 271 | 0.0000 | 0.0440 | 0.9000 | 0.0561 |
| 272 | 0.9863 | 0.0137 | 0.0000 | 0.0000 |
| 286 | 0.0000 | 0.8009 | 0.1848 | 0.0143 |
| 83  | 1.0000 | 0.0000 | 0.0000 | 0.0000 |
| 84  | 0.9352 | 0.0520 | 0.0128 | 0.0000 |
| 85  | 0.9991 | 0.0000 | 0.0009 | 0.0000 |
| 9   | 0.0556 | 0.7624 | 0.0534 | 0.1286 |
| 91  | 0.0160 | 0.0000 | 0.6940 | 0.2900 |

(d) K= 5

| Sample ID | Cluster 1 | Cluster 2 | Cluster 3 | Cluster 4 | Cluster 5 |
|-----------|-----------|-----------|-----------|-----------|-----------|
| 114       | 0.9314    | 0.0685    | 0.0000    | 0.0000    | 0.0000    |
| 165       | 0.1599    | 0.3660    | 0.4741    | 0.0000    | 0.0000    |
| 170       | 0.0112    | 0.3409    | 0.6479    | 0.0000    | 0.0000    |
| 171       | 0.0000    | 0.1810    | 0.8190    | 0.0000    | 0.0000    |
| 172       | 0.0000    | 0.0891    | 0.8558    | 0.0449    | 0.0102    |
| 173       | 0.0000    | 0.2671    | 0.6137    | 0.1178    | 0.0014    |
| 174       | 0.0000    | 0.0852    | 0.9147    | 0.0000    | 0.0000    |
| 175       | 0.0000    | 0.0000    | 0.0000    | 1.0000    | 0.0000    |
| 176       | 0.0000    | 0.0213    | 0.2039    | 0.7346    | 0.0402    |
| 177       | 0.0000    | 0.0000    | 0.0000    | 0.0000    | 1.0000    |
| 178       | 0.0000    | 0.0000    | 0.0000    | 0.0000    | 1.0000    |
| 179       | 0.8511    | 0.0000    | 0.0000    | 0.1488    | 0.0000    |
| 181       | 0.7922    | 0.0306    | 0.1772    | 0.0000    | 0.0000    |
| 182       | 1.0000    | 0.0000    | 0.0000    | 0.0000    | 0.0000    |
| 184       | 1.0000    | 0.0000    | 0.0000    | 0.0000    | 0.0000    |
| 185       | 0.3767    | 0.0583    | 0.5650    | 0.0000    | 0.0000    |
| 186       | 0.0000    | 0.0531    | 0.7166    | 0.1767    | 0.0536    |
| 187       | 0.1527    | 0.0867    | 0.1102    | 0.5376    | 0.1129    |
| 188       | 0.2302    | 0.0404    | 0.1618    | 0.5590    | 0.0086    |
| 189       | 0.0000    | 0.0498    | 0.8358    | 0.1143    | 0.0000    |
| 190       | 0.0000    | 1.0000    | 0.0000    | 0.0000    | 0.0000    |
| 191       | 0.0000    | 1.0000    | 0.0000    | 0.0000    | 0.0000    |
| 192       | 0.0000    | 1.0000    | 0.0000    | 0.0000    | 0.0000    |
| 193       | 0.0000    | 1.0000    | 0.0000    | 0.0000    | 0.0000    |
| 194       | 0.8061    | 0.0205    | 0.1734    | 0.0000    | 0.0000    |
| 195       | 0.9696    | 0.0000    | 0.0000    | 0.0000    | 0.0303    |
| 196       | 0.1712    | 0.0342    | 0.5248    | 0.2699    | 0.0000    |
| 197       | 0.2773    | 0.0641    | 0.0715    | 0.4566    | 0.1306    |
| 198       | 0.8386    | 0.0175    | 0.1439    | 0.0000    | 0.0000    |
| 199       | 0.5348    | 0.1913    | 0.1499    | 0.1239    | 0.0000    |

|     |        |        |        |        |        |
|-----|--------|--------|--------|--------|--------|
| 200 | 1.0000 | 0.0000 | 0.0000 | 0.0000 | 0.0000 |
| 201 | 0.0000 | 0.0000 | 0.0350 | 0.3020 | 0.6630 |
| 202 | 1.0000 | 0.0000 | 0.0000 | 0.0000 | 0.0000 |
| 203 | 0.0000 | 0.0000 | 0.0000 | 0.0000 | 1.0000 |
| 211 | 0.5756 | 0.3354 | 0.0889 | 0.0000 | 0.0000 |
| 233 | 0.0000 | 0.0000 | 0.0000 | 1.0000 | 0.0000 |
| 243 | 0.0000 | 0.0359 | 0.6716 | 0.2829 | 0.0096 |
| 244 | 0.0000 | 0.0000 | 0.0000 | 0.0000 | 1.0000 |
| 245 | 0.6928 | 0.0253 | 0.2207 | 0.0372 | 0.0240 |
| 246 | 0.3819 | 0.0533 | 0.0260 | 0.5388 | 0.0000 |
| 247 | 0.0000 | 0.0000 | 0.0000 | 0.9072 | 0.0928 |
| 248 | 0.0000 | 0.0101 | 0.1230 | 0.7210 | 0.1459 |
| 249 | 0.3382 | 0.0009 | 0.0000 | 0.6609 | 0.0000 |
| 251 | 0.0000 | 0.0000 | 0.0000 | 0.0000 | 1.0000 |
| 253 | 1.0000 | 0.0000 | 0.0000 | 0.0000 | 0.0000 |
| 254 | 0.0000 | 0.0000 | 0.0599 | 0.8466 | 0.0935 |
| 255 | 0.0000 | 0.0000 | 0.0000 | 1.0000 | 0.0000 |
| 256 | 0.0000 | 0.0000 | 0.0000 | 0.7812 | 0.2188 |
| 257 | 0.0000 | 0.0000 | 0.0000 | 0.0000 | 1.0000 |
| 259 | 0.3316 | 0.0968 | 0.1606 | 0.4110 | 0.0000 |
| 262 | 0.0000 | 0.0000 | 0.0238 | 0.7034 | 0.2728 |
| 263 | 0.0000 | 0.0000 | 0.0000 | 0.3186 | 0.6814 |
| 264 | 0.0000 | 0.0000 | 0.0000 | 0.0000 | 1.0000 |
| 265 | 0.0000 | 0.0000 | 0.0000 | 1.0000 | 0.0000 |
| 266 | 0.0000 | 0.0000 | 0.0659 | 0.7707 | 0.1634 |
| 267 | 0.0000 | 0.0000 | 0.0000 | 0.0000 | 1.0000 |
| 268 | 0.9992 | 0.0000 | 0.0000 | 0.0007 | 0.0000 |
| 269 | 0.9995 | 0.0000 | 0.0000 | 0.0000 | 0.0004 |
| 270 | 0.0000 | 0.0000 | 0.0000 | 0.8535 | 0.1465 |
| 271 | 0.0000 | 0.0000 | 0.0000 | 1.0000 | 0.0000 |
| 272 | 0.9170 | 0.0000 | 0.0830 | 0.0000 | 0.0000 |
| 286 | 0.0000 | 0.4398 | 0.4603 | 0.0999 | 0.0000 |
| 83  | 1.0000 | 0.0000 | 0.0000 | 0.0000 | 0.0000 |
| 84  | 0.8461 | 0.0924 | 0.0615 | 0.0000 | 0.0000 |
| 85  | 1.0000 | 0.0000 | 0.0000 | 0.0000 | 0.0000 |
| 9   | 0.0447 | 0.3750 | 0.4548 | 0.0000 | 0.1255 |
| 91  | 0.0000 | 0.0000 | 0.0000 | 0.8546 | 0.1454 |

---

**Table S3.** Common measures of genetic diversity for 67 *C. pubescens* samples from the inferred clusters at  $K=2,4,5$  calculated from 1,462 unlinked biallelic SNPs markers following (a) Admixture and (b) DAPC assignments, and also (c) Admixture n-balanced calculations. Samples origin/Clusters are named according to phylogenetic network grouping (Figure 2a) (see Table footers).

N = number of individuals; %P = percentage of polymorphic SNPs; A = total number of alleles;  $A_R$  = allelic richness,  $A_P$  = private allelic richness;  $H_O$  = observed heterozygosity;  $H_E$  = expected heterozygosity;  $F_{IS}$  = inbreeding coefficient;  $F_{IS}$  (95% CI) = lower and upper 95% confidence intervals of inbreeding coefficients.

**(a) Admixture assignment**

| K-value | Cluster | N  | %P    | A    | $A_R$  | $A_P$  | $H_O$  | $H_E$  | $F_{IS}$ | $F_{IS}$ (95% CI) |
|---------|---------|----|-------|------|--------|--------|--------|--------|----------|-------------------|
| 2       | 1       | 27 | 96.54 | 2819 | 1.7110 | 0.2840 | 0.2168 | 0.2106 | 0.0044   | -0.0217, 0.0066   |
|         | 2       | 25 | 87.57 | 2557 | 1.5842 | 0.1573 | 0.1265 | 0.1647 | 0.1856   | 0.1480, 0.2518    |
| 4       | 1       | 18 | 90.31 | 2619 | 1.1971 | 0.1172 | 0.2025 | 0.1905 | -0.0178  | -0.0460, -0.0111  |
|         | 2       | 8  | 84.07 | 2438 | 1.2281 | 0.1329 | 0.2374 | 0.2053 | -0.0478  | -0.0728, -0.0221  |
|         | 3       | 10 | 80.31 | 2329 | 1.1767 | 0.0800 | 0.1448 | 0.1661 | 0.1383   | 0.1006, 0.2037    |
|         | 4       | 10 | 70.31 | 2039 | 1.1155 | 0.0642 | 0.1020 | 0.1084 | 0.1011   | 0.0816, 0.1698    |
| 5       | 1       | 17 | 89.18 | 2604 | 1.1944 | 0.0912 | 0.1996 | 0.1874 | -0.0181  | -0.0452, -0.0088  |
|         | 2       | 4  | 73.15 | 2136 | 1.1941 | 0.0912 | 0.2331 | 0.1671 | -0.2141  | -0.2778, -0.2172  |
|         | 3       | 5  | 84.73 | 2474 | 1.2603 | 0.1245 | 0.2873 | 0.2278 | -0.1111  | -0.1514, -0.0997  |
|         | 4       | 14 | 83.63 | 2442 | 1.1782 | 0.0586 | 0.1373 | 0.1707 | 0.1793   | 0.1488, 0.2279    |
|         | 5       | 8  | 66.51 | 1942 | 1.1019 | 0.0451 | 0.0955 | 0.0943 | 0.0511   | 0.0156, 0.1231    |

Samples origin/Clusters:  $K=2$ - Cluster 1: C-S Bolivia-Argentina, Villa Serrano (Bolivia), C-W Bolivia; Cluster 2: Peru-Ecuador, Central America-Mexico.  $K=4$ - Cluster 1: C-S Bolivia-Argentina; Cluster 2: C-W Bolivia (La Paz surroundings); Cluster 3: Peru-Ecuador; Cluster 4: Central America-Mexico.  $K=5$ - Cluster 1: C-S Bolivia-Argentina, Cluster 2: Villa Serrano (Bolivia); Cluster 3: C-W Bolivia (La Paz surroundings); Cluster 4: Peru-Ecuador; Cluster 5: Central America-Mexico.

**(b) DAPC assignment**

| K-value | Cluster | N  | %P    | A    | $A_R$  | $A_P$  | $H_O$  | $H_E$  | $F_{IS}$ | $F_{IS}$ (95% CI) |
|---------|---------|----|-------|------|--------|--------|--------|--------|----------|-------------------|
| 2       | 1       | 40 | 99.18 | 2900 | 1.7662 | 0.2805 | 0.2203 | 0.2196 | 0.0197   | 0.0010, 0.0245    |
|         | 2       | 27 | 90.46 | 2645 | 1.6071 | 0.1273 | 0.1389 | 0.1721 | 0.1486   | 0.1366, 0.1893    |
| 4       | 1       | 21 | 93.43 | 2732 | 1.2052 | 0.1160 | 0.2122 | 0.1993 | -0.0151  | -0.0616, -0.0162  |
|         | 2       | 4  | 73.12 | 2138 | 1.1939 | 0.1129 | 0.2328 | 0.1669 | -0.2141  | -0.3000, -0.2119  |
|         | 3       | 33 | 97.57 | 2853 | 1.2104 | 0.1009 | 0.1896 | 0.2065 | 0.0807   | 0.0266, 0.1592    |
|         | 4       | 9  | 69.46 | 2031 | 1.1118 | 0.0662 | 0.1008 | 0.1044 | 0.0843   | 0.0729, 0.1204    |
| 5       | 1       | 21 | 93.43 | 2732 | 1.2052 | 0.0943 | 0.2122 | 0.1993 | -0.0151  | -0.0500, -0.0198  |
|         | 2       | 4  | 73.12 | 2138 | 1.1939 | 0.0917 | 0.2328 | 0.1669 | -0.2141  | -0.2800, -0.2180  |
|         | 3       | 17 | 95.69 | 2798 | 1.2325 | 0.0951 | 0.2388 | 0.2238 | -0.0239  | -0.0433, -0.0133  |
|         | 4       | 16 | 86.11 | 2518 | 1.1794 | 0.0593 | 0.1417 | 0.1727 | 0.1625   | 0.1506, 0.2038    |
|         | 5       | 9  | 69.46 | 2031 | 1.1118 | 0.0491 | 0.1008 | 0.1044 | 0.0843   | 0.0549, 0.1535    |

Samples origin/Clusters:  $K=2$ - Cluster 1: C-S Bolivia-Argentina, Villa Serrano (Bolivia), C-W Bolivia; Cluster 2: Peru-Ecuador, Central America-Mexico.  $K=4$ - Cluster 1: C-S Bolivia-Argentina; Cluster 2: Villa Serrano (Bolivia); Cluster 3: Peru-Ecuador, C-W Bolivia; Cluster 4: Central America-Mexico.  $K=5$ - Cluster 1: C-S Bolivia-Argentina, Cluster 2: Villa Serrano (Bolivia); Cluster 3: C-W Bolivia; Cluster 4: Peru-Ecuador, C-W Bolivia (La Paz markets); Cluster 5: Central America-Mexico.

(c) Admixture n-balanced

| K-value | Cluster | N  | %P    | A    | A <sub>R</sub> | A <sub>P</sub> | H <sub>O</sub> | H <sub>E</sub> | F <sub>IS</sub> | F <sub>IS</sub> (95% CI) |
|---------|---------|----|-------|------|----------------|----------------|----------------|----------------|-----------------|--------------------------|
| 2       | 1       | 27 | 96.54 | 2819 | 1.7110         | 0.2840         | 0.2168         | 0.2106         | 0.0044          | -0.0217, 0.0066          |
|         | 2       | 25 | 87.57 | 2557 | 1.5842         | 0.1573         | 0.1265         | 0.1647         | 0.1856          | 0.1480, 0.2518           |
| 3       | 1       | 10 | 85.07 | 2455 | 1.3987         | 0.1594         | 0.2075         | 0.1887         | -0.0268         | -0.0594, -0.0144         |
|         | 2       | 10 | 92.76 | 2677 | 1.5105         | 0.2253         | 0.2630         | 0.2388         | -0.0324         | -0.0554, -0.0161         |
|         | 3       | 10 | 70.76 | 2042 | 1.2349         | 0.0749         | 0.1065         | 0.1113         | 0.0880          | 0.0661, 0.1550           |
| 4       | 1       | 21 | 93.43 | 2732 | 1.2052         | 0.1160         | 0.2122         | 0.1993         | -0.0151         | -0.0616, -0.0162         |
|         | 2       | 4  | 73.12 | 2138 | 1.1939         | 0.1129         | 0.2328         | 0.1669         | -0.2141         | -0.3000, -0.2119         |
|         | 3       | 33 | 97.57 | 2853 | 1.2104         | 0.1009         | 0.1896         | 0.2065         | 0.0807          | 0.0266, 0.1592           |
|         | 4       | 9  | 69.46 | 2031 | 1.1118         | 0.0662         | 0.1008         | 0.1044         | 0.0843          | 0.0729, 0.1204           |
| 5       | 1       | 8  | 81.40 | 2364 | 1.1931         | 0.0913         | 0.2046         | 0.1790         | -0.0478         | -0.0875, -0.0429         |
|         | 2       | 4  | 73.24 | 2127 | 1.1935         | 0.0886         | 0.2315         | 0.1664         | -0.2088         | -0.1743, -0.2253         |
|         | 3       | 8  | 83.71 | 2431 | 1.2268         | 0.1017         | 0.2364         | 0.2041         | -0.0498         | -0.0733, -0.0246         |
|         | 4       | 8  | 78.37 | 2276 | 1.1743         | 0.0619         | 0.1247         | 0.1620         | 0.2277          | 0.1658, 0.2676           |
|         | 5       | 8  | 66.87 | 1942 | 1.1049         | 0.0500         | 0.0979         | 0.0971         | 0.0538          | 0.0207, 0.1262           |

Samples origin/Clusters: K= 2- Cluster 1: C-S Bolivia-Argentina, Villa Serrano (Bolivia), C-W Bolivia; Cluster 2: Peru-Ecuador, Central America-Mexico. K= 3- Cluster 1: C-S Bolivia-Argentina; Cluster 2: Villa Serrano (Bolivia), C-W Bolivia, Peru-Ecuador; Cluster 3: Central America-Mexico; K= 4- Cluster 1: C-S Bolivia-Argentina; Cluster 2: C-W Bolivia (La Paz surroundings); Cluster 3: Peru-Ecuador; Cluster 4: Central America-Mexico. K= 5- Cluster 1: C-S Bolivia-Argentina, Cluster 2: Villa Serrano (Bolivia); Cluster 3: C-W Bolivia (La Paz surroundings); Cluster 4: Peru-Ecuador; Cluster 5: Central America-Mexico.

**Table S4.** Pairwise genetic differentiation ( $F_{ST}$ ) among the inferred clusters of *C. pubescens* at  $K=2,4,5$  calculated from 1,462 unlinked biallelic SNPs markers following (a) Admixture and (b) DAPC assignments, and also (c) Admixture n-balanced calculations. Samples origin/Clusters are named according to phylogenetic network grouping (Figure 2a) (see Table footers).

(a) Admixture assignment

| $K=2$     | Cluster 1 | Cluster 2       |
|-----------|-----------|-----------------|
| Cluster 1 | -         | 0.0776 - 0.0908 |
| Cluster 2 | 0.0840    | -               |

Cluster 1: C-S Bolivia-Argentina, Villa Serrano (Bolivia), C-W Bolivia; Cluster 2: Peru-Ecuador, Central

| $K=4$     | Cluster 1 | Cluster 2       | Cluster 3       | Cluster 4       |
|-----------|-----------|-----------------|-----------------|-----------------|
| Cluster 1 | -         | 0.1364 – 0.1738 | 0.0739 – 0.0907 | 0.2202 – 0.2614 |
| Cluster 2 | 0.1553    | -               | 0.1043 – 0.1417 | 0.3096 – 0.3605 |
| Cluster 3 | 0.0817    | 0.1233          | -               | 0.1158 – 0.1479 |
| Cluster 4 | 0.2404    | 0.3368          | 0.1322          | -               |

Cluster 1: C-S Bolivia-Argentina; Cluster 2: C-W Bolivia (La Paz surroundings); Cluster 3: Peru-Ecuador; Cluster 4: Central America-Mexico

| $K=5$     | Cluster 1 | Cluster 2       | Cluster 3       | Cluster 4       | Cluster 5       |
|-----------|-----------|-----------------|-----------------|-----------------|-----------------|
| Cluster 1 | -         | 0.1396 – 0.1711 | 0.0644 – 0.0780 | 0.1084 – 0.1282 | 0.2231 – 0.2573 |
| Cluster 2 | 0.1553    | -               | 0.1044 – 0.1334 | 0.1479 – 0.1840 | 0.3141 – 0.3583 |
| Cluster 3 | 0.0711    | 0.1189          | -               | 0.0381 – 0.0507 | 0.1554 – 0.1836 |
| Cluster 4 | 0.1183    | 0.1651          | 0.0441          | -               | 0.1300 – 0.1612 |
| Cluster 5 | 0.2404    | 0.3368          | 0.1692          | 0.1460          | -               |

Cluster 1: C-S Bolivia-Argentina, Cluster 2: Villa Serrano (Bolivia); Cluster 3: C-W Bolivia (La Paz surroundings); Cluster 4: Peru-Ecuador; Cluster 5: Central America-Mexico.

(b) DAPC assignment

| $K=2$ | 1      | 2               |
|-------|--------|-----------------|
| 1     | -      | 0.0776 - 0.0908 |
| 2     | 0.0840 | -               |

Cluster 1: C-S Bolivia-Argentina, Villa Serrano (Bolivia), C-W Bolivia; Cluster 2: Peru-Ecuador, Central America-Mexico.

| $K=4$     | Cluster 1 | Cluster 2       | Cluster 3       | Cluster 4       |
|-----------|-----------|-----------------|-----------------|-----------------|
| Cluster 1 | -         | 0.1364 – 0.1738 | 0.0739 – 0.0907 | 0.2202 – 0.2614 |
| Cluster 2 | 0.1553    | -               | 0.1043 – 0.1417 | 0.3096 – 0.3605 |
| Cluster 3 | 0.0817    | 0.1233          | -               | 0.1158 – 0.1479 |
| Cluster 4 | 0.2404    | 0.3368          | 0.1322          | -               |

Cluster 1: C-S Bolivia-Argentina; Cluster 2: Villa Serrano (Bolivia); Cluster 3: Peru-Ecuador, C-W Bolivia; Cluster 4: Central America-Mexico.

| $K=5$     | Cluster 1 | Cluster 2       | Cluster 3       | Cluster 4       | Cluster 5       |
|-----------|-----------|-----------------|-----------------|-----------------|-----------------|
| Cluster 1 | -         | 0.1396 – 0.1711 | 0.0644 – 0.0780 | 0.1084 – 0.1282 | 0.2231 – 0.2573 |
| Cluster 2 | 0.1553    | -               | 0.1044 – 0.1334 | 0.1479 – 0.1840 | 0.3141 – 0.3583 |
| Cluster 3 | 0.0711    | 0.1189          | -               | 0.0381 – 0.0507 | 0.1554 – 0.1836 |
| Cluster 4 | 0.1183    | 0.1651          | 0.0441          | -               | 0.1300 – 0.1612 |
| Cluster 5 | 0.2404    | 0.3368          | 0.1692          | 0.1460          | -               |

Cluster 1: C-S Bolivia-Argentina, Cluster 2: Villa Serrano (Bolivia); Cluster 3: C-W Bolivia; Cluster 4: Peru-Ecuador, C-W Bolivia (La Paz markets); Cluster 5: Central America-Mexico.

(c) Admixture n-balanced

| <b>K= 2</b>      | <b>Cluster 1</b> | <b>Cluster 2</b> |
|------------------|------------------|------------------|
| <b>Cluster 1</b> | -                | 0.1105 – 0.1273  |
| <b>Cluster 2</b> | 0.1189           | -                |

Cluster 1: C-S Bolivia-Argentina, Villa Serrano (Bolivia), C-W Bolivia; Cluster 2: Peru-Ecuador, Central America-Mexico.

| <b>K= 2</b>      | <b>Cluster 1</b> | <b>Cluster 2</b> | <b>Cluster 3</b> |
|------------------|------------------|------------------|------------------|
| <b>Cluster 1</b> | -                | 0.0855 – 0.1001  | 0.2330 – 0.2672  |
| <b>Cluster 2</b> | 0.0933           | -                | 0.1578 – 0.1860  |
| <b>Cluster 3</b> | 0.2501           | 0.1718           | -                |

Cluster 1: C-S Bolivia-Argentina; Cluster 2: Villa Serrano (Bolivia), C-W Bolivia, Peru-Ecuador; Cluster 3: Central America-Mexico.

| <b>K= 4</b>      | <b>Cluster 1</b> | <b>Cluster 2</b> | <b>Cluster 3</b> | <b>Cluster 4</b> |
|------------------|------------------|------------------|------------------|------------------|
| <b>Cluster 1</b> | -                | 0.1074 - 0.1464  | 0.1240 – 0.1464  | 0.2324 – 0.2674  |
| <b>Cluster 2</b> | 0.1181           | -                | 0.1010 – 0.1274  | 0.2390 – 0.2742  |
| <b>Cluster 3</b> | 0.1351           | 0.1708           | -                | 0.1527 – 0.1878  |
| <b>Cluster 4</b> | 0.2501           | 0.2569           | 0.1708           | -                |

Cluster 1: C-S Bolivia-Argentina; Cluster 2: C-W Bolivia (La Paz surroundings); Cluster 3: Peru-Ecuador; Cluster 4: Central America-Mexico.

| <b>K= 5</b>      | <b>Cluster 1</b> | <b>Cluster 2</b> | <b>Cluster 3</b> | <b>Cluster 4</b> | <b>Cluster 5</b> |
|------------------|------------------|------------------|------------------|------------------|------------------|
| <b>Cluster 1</b> | -                | 0.1597 - 0.1923  | 0.1267 - 0.1497  | 0.1220 - 0.1434  | 0.2519 - 0.2902  |
| <b>Cluster 2</b> | 0.1761           | -                | 0.1501 - 0.1848  | 0.2421 - 0.2776  | 0.3350 - 0.3791  |
| <b>Cluster 3</b> | 0.1377           | 0.1662           | -                | 0.0709 - 0.0938  | 0.1501 - 0.1871  |
| <b>Cluster 4</b> | 0.1321           | 0.2595           | 0.0826           | -                | 0.1452 - 0.1769  |
| <b>Cluster 5</b> | 0.2711           | 0.3569           | 0.1681           | 0.1616           | -                |

Cluster 1: C-S Bolivia-Argentina, Cluster 2: Villa Serrano (Bolivia); Cluster 3: C-W Bolivia (La Paz surroundings); Cluster 4: Peru-Ecuador; Cluster 5: Central America-Mexico.
